# Supplementary material for: A Flexible and Attachable Colorimetric Film Sensor for the Detection of Gaseous Ammonia
Source: MDPI journal article supplement (doi:10.3390/bios12080664), 2022-08-21
Supplement: s1 [file s1]

# A Flexible and Attachable Colorimetric Film Sensor for the Detection of Gaseous Ammonia

Sangwon Lee <sup>1</sup>, Eun-Hee Lee <sup>2,\*</sup> and Seung-Woo Lee <sup>1,3,4,\*</sup>

<sup>1</sup> Department of Fine Chemistry, Seoul National University of Science and Technology, 232 Gongneung-ro, Nowon-gu, Seoul, 01811, Korea

<sup>2</sup> Department of Microbiology, Pusan National University, 2 Busandaehak-ro 63 Beon-gil, Geumjeong-gu, Busan, 46241, Korea

<sup>3</sup> Department of Nano Bio Engineering, Seoul National University of Science and Technology, 232 Gongneung-ro, Nowon-gu, Seoul, 01811, Korea

<sup>4</sup> Center for Functional Biomaterials, Seoul National University of Science and Technology, 232 Gongneung-ro, Nowon-gu, Seoul, 01811, Korea

\* Correspondence: leeeh@pusan.ac.kr (E.-H.L.); swlee@seoultech.ac.kr (S.-W.L.)

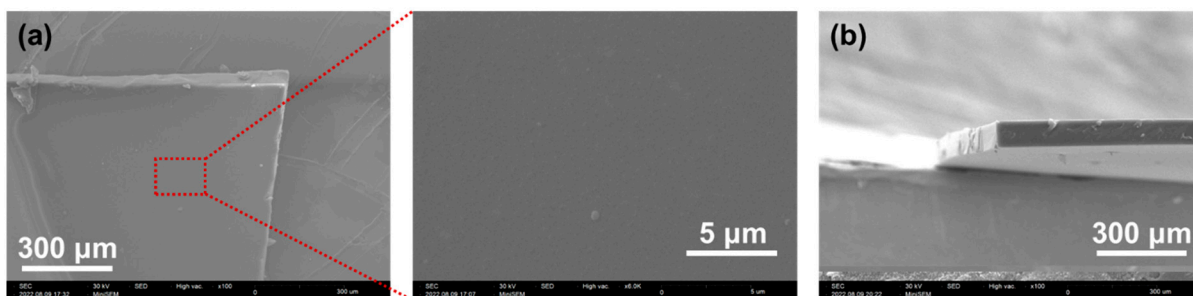

**Figure S1.** Scanning electron microscope (SEM) images of the colorimetric film sensor. (a) Surface and (b) cross-sectional images of the sensor.

(a)

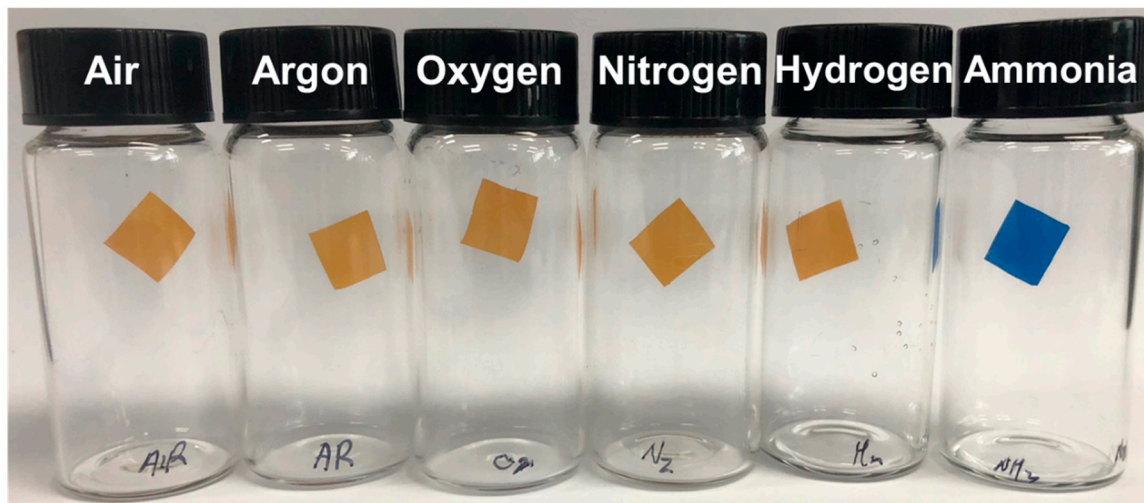

(b)

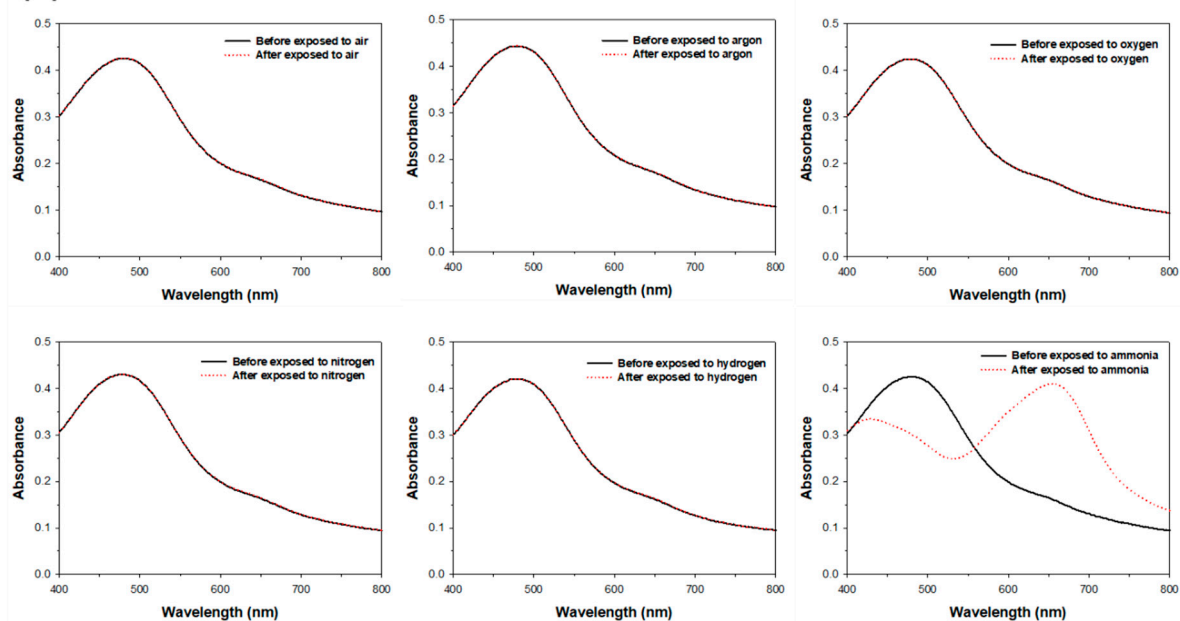

**Figure S2.** (a) Photographs and (b) absorbance spectra of film sensors upon exposure to gases, specifically air, argon (Ar), oxygen (O<sub>2</sub>), nitrogen (N<sub>2</sub>), hydrogen (H<sub>2</sub>), and ammonia (NH<sub>3</sub>).

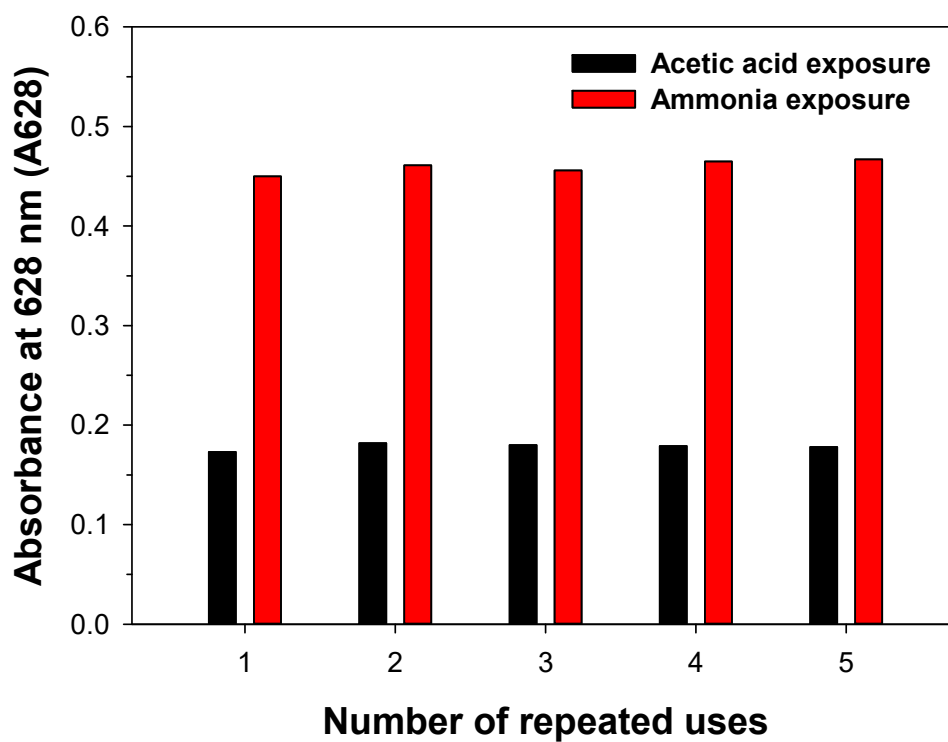

**Figure S3.** Reusability of the colorimetric film sensor. Changes of absorbance at 628 nm (A628) of the sensor reused five times are presented.

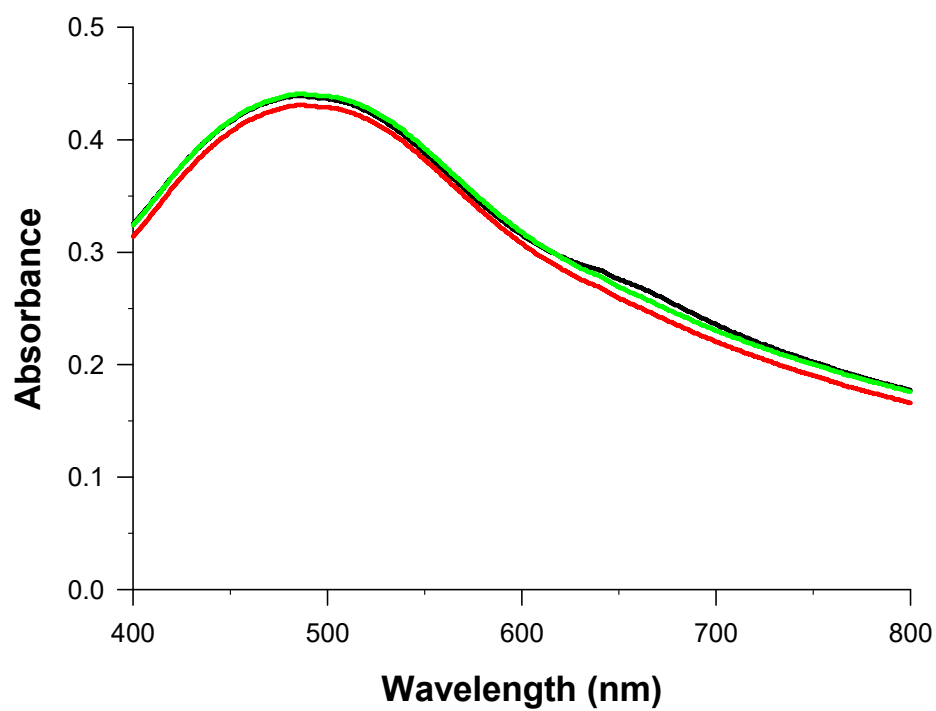

**Figure S4.** Stability of a colorimetric film sensor. Absorbance spectra of the film sensor before (i.e., original film sensor, black line) and after stored at ambient condition for 1 (red line) and 2 years (green line), respectively.
